# CORRECTION

## Correction: Effects of hazard types on drivers' risk rating and hazard response in a video-based hazard perception task

The PLOS ONE Staff

### Notice of Republication

This article was republished on April 9, 2019 to correct for significant typographical errors introduced during the typesetting process. The publisher apologizes for the errors. Please download this article again to view the correct version. The originally published, uncorrected article and the republished, corrected article are provided here for reference.

### Supporting information

**S1 File. Originally published, uncorrected article.**

(PDF)

**S2 File. Republished, corrected article.**

(PDF)

### Reference

1. Sun L, Hua L (2019) Effects of hazard types on drivers' risk rating and hazard response in a video-based hazard perception task. PLoS ONE 14(3): e0214226. <https://doi.org/10.1371/journal.pone.0214226> PMID: 30897146

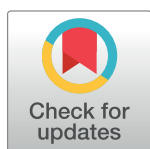

### OPEN ACCESS

**Citation:** The PLOS ONE Staff (2019) Correction: Effects of hazard types on drivers' risk rating and hazard response in a video-based hazard perception task. PLoS ONE 14(4): e0215744. <https://doi.org/10.1371/journal.pone.0215744>

**Published:** April 16, 2019

**Copyright:** © 2019 The PLOS ONE Staff. This is an open access article distributed under the terms of the [Creative Commons Attribution License](https://creativecommons.org/licenses/by/4.0/), which permits unrestricted use, distribution, and reproduction in any medium, provided the original author and source are credited.
